# Supplementary material for: Shear Wave Predictions of Achilles Tendon Loading during Human Walking
Source: PubMed Central journal article supplement (PMC6748912; doi:10.1038/s41598-019-49063-7), 2019-09-17
Supplement: 41598_2019_49063_MOESM1_ESM.pdf [file 41598_2019_49063_MOESM1_ESM.pdf]

# Shear Wave Predictions of Achilles Tendon Loading during Human Walking

Emily M. Keuler, Isaac Loegering, Jack A. Martin, Joshua D. Roth, Darryl G. Thelen

University of Wisconsin-Madison

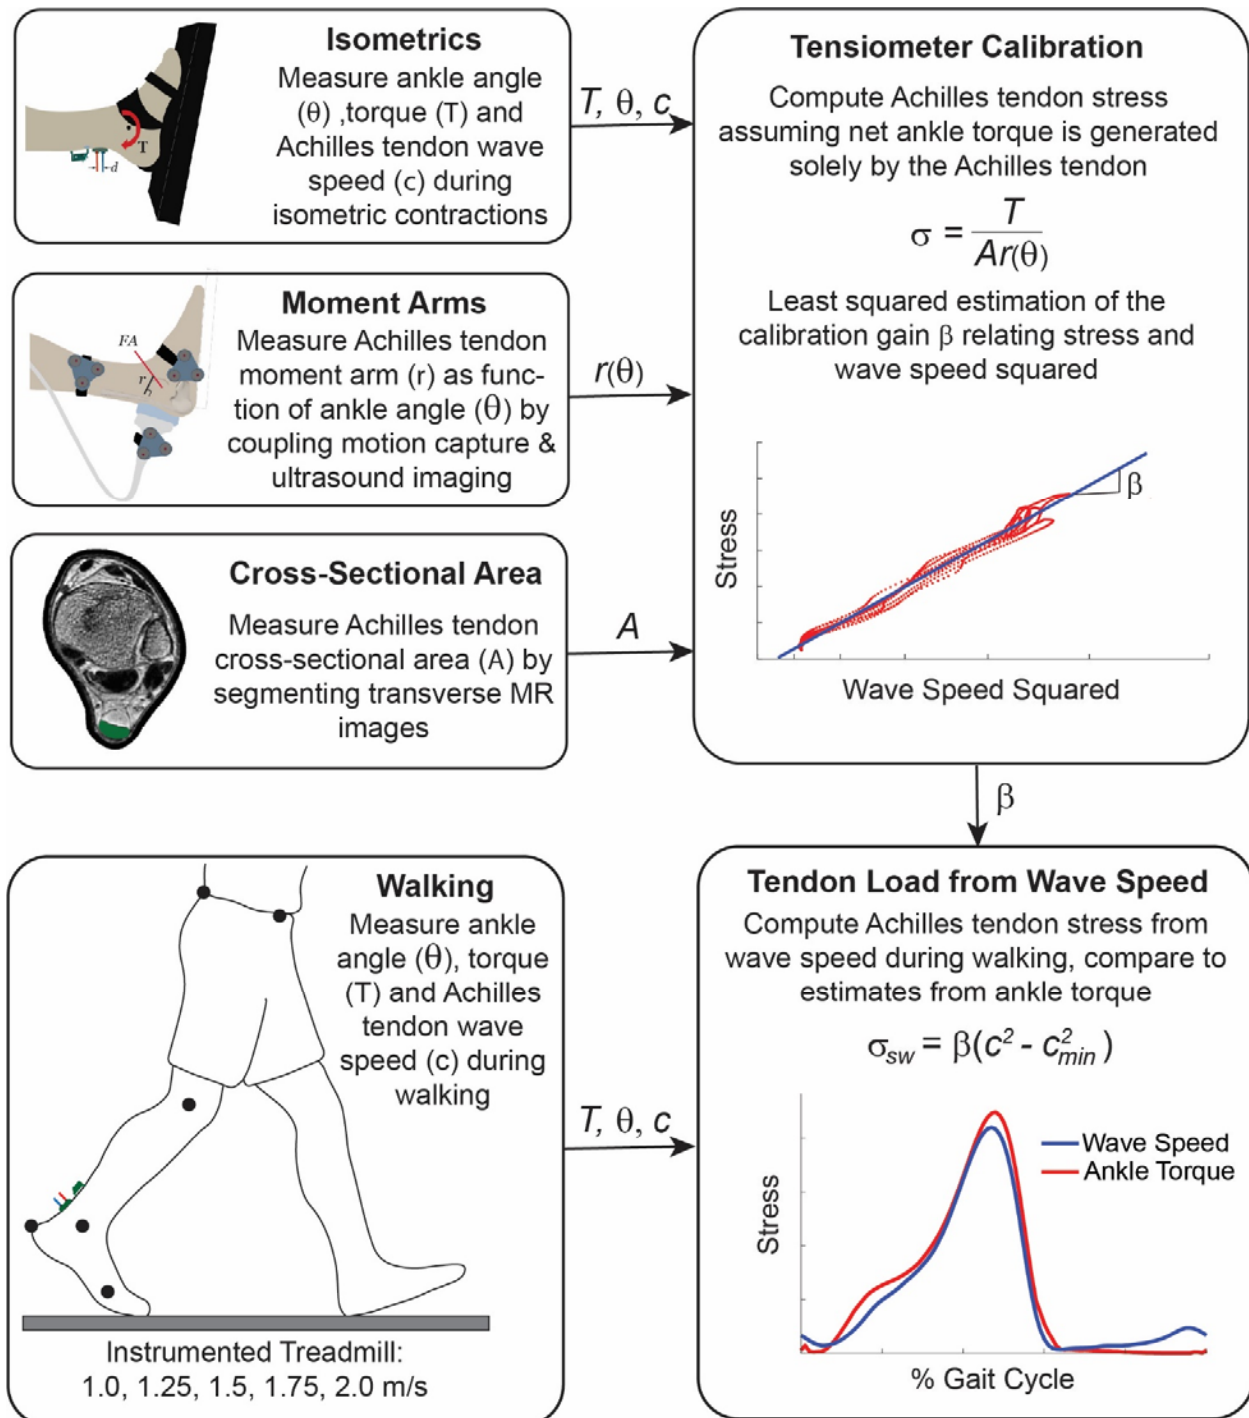

**Supplementary Figure 1** | Schematic of the subject-specific measurements, tensiometer calibration and use of calibrated tensiometers to predict tendon loads during walking.
